# Supplementary material
Source: MDPI journal article supplement (https://www.mdpi.com/2073-4344/11/9/1061)
Supplement: s1 [file s1]

# **Effect of MAF-6 crystal size on its physicochemical and catalytic properties in the cycloaddition of CO<sub>2</sub> to propylene oxide**

M.N. Timofeeva<sup>1,2\*</sup>, I.A. Lukoyanov<sup>1,2</sup>, Biswa Nath Bhadra<sup>3</sup>,  
V.N. Panchenko<sup>1,2</sup>, E.Yu. Gerasimov<sup>1</sup>, Sung Hwa Jung<sup>3\*</sup>

<sup>1</sup> *Boreskov Institute of Catalysis SB RAS, Prospekt Akad. Lavrentieva 5, 630090, Novosibirsk, Russian Federation*

<sup>2</sup> *Novosibirsk State Technical University, Prospekt K. Marksa 20, 630092, Novosibirsk, Russian Federation*

<sup>3</sup> *Department of Chemistry and Green-Nano Materials Research Center, Kyungpook National University, DaeHak-Ro 80, Buk-Ku, Daegu 41566, Republic of Korea*

## **Corresponding authors**

S.H. Jung

Tel: +82-53-950-5341

Fax: +82-53-950-6330

E-mail: [sung@knu.ac.kr](mailto:sung@knu.ac.kr)

Address: Department of Chemistry and Green-Nano Materials Research Center, Kyungpook National University, DaeHak-Ro 80, Buk-Ku, Daegu 41566, Republic of Korea

M.N. Timofeeva

Tel.: +7-383-330-7284

Fax: +7-383-330-8056

E-mail: [timofeeva@catalysis.ru](mailto:timofeeva@catalysis.ru)

Address: Boreskov Institute of Catalysis SB RAS, Prospekt Akad. Lavrentieva 5, 630090, Novosibirsk, Russian Federation

## Content

|                                                                                                            | Page |
|------------------------------------------------------------------------------------------------------------|------|
| 1 <b>Structural properties of ZIFs</b>                                                                     | 3    |
| 2 <b>Characterization of MAF-5</b>                                                                         | 4    |
| 3 <b>Characterization of MAF-6 samples</b>                                                                 | 5    |
| 3.1   Textural properties of MAF-6 samples                                                                 | 5    |
| 3.2   Characterization of MAF-6 samples by IR spectroscopy                                                 | 5    |
| 3.3   Characterization of MAF-6 samples by DR-UV-vis spectroscopy                                          | 6    |
| 3.4   Characterization of MAF-6 samples by DRIFT spectroscopy using CDCl <sub>3</sub> as<br>probe molecule | 7    |
| 3.5   Characterization of MAF-6 samples by X-ray spectroscopy                                              | 8    |
| 4 <b>Catalytic properties</b>                                                                              | 9    |
| 4.1   Catalytic properties of MAF-5                                                                        | 9    |
| 4.2   Catalytic properties of MAF-6 samples                                                                | 9    |
| 5 <b>References</b>                                                                                        | 11   |

## 1. Structural properties of ZIFs

**Table S1.** Structural properties of ZIF-8, MAF-5 and MAF-6 [1]

|                                   | ZIF-8                                                                             | MAF-5 (ZIF-14)                                                                      | MAF-6 (ZIF-71)                                                                      |
|-----------------------------------|-----------------------------------------------------------------------------------|-------------------------------------------------------------------------------------|-------------------------------------------------------------------------------------|
| Tightly packed metal imidazolates | [Zn(Mim) <sub>2</sub> ]                                                           | [Zn(Eim) <sub>2</sub> ]                                                             | [Zn(Eim) <sub>2</sub> ]                                                             |
| Topology                          | SOD                                                                               | ANA                                                                                 | RHO                                                                                 |
| 3D framework structure            | 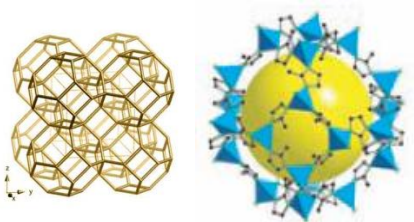 |  |  |
| Type of porosity                  | Cage                                                                              | Cages                                                                               | Cages                                                                               |
| Cage                              | [4 <sup>6</sup> 6 <sup>8</sup> ]                                                  | 3·[4 <sup>2</sup> 8 <sup>2</sup> ]+2·[6 <sup>2</sup> 8 <sup>3</sup> ]               | 3·[4 <sup>12</sup> 6 <sup>8</sup> 8 <sup>6</sup> ]                                  |
| Cavity size (Å)                   | 11.6                                                                              | 7x10                                                                                | 18.7                                                                                |
| Pore aperture (Å)                 | 3.4x3.4                                                                           | 4.0x5.8                                                                             | 7.6x7.6                                                                             |

## 2. Characterization of MAF-5

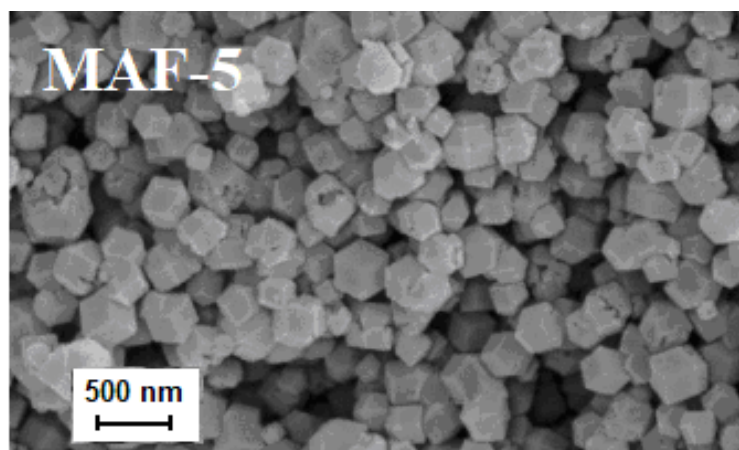

**Figure S1.** SEM image of MAF-5

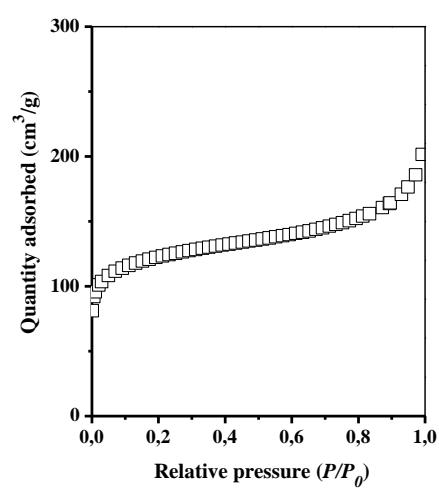

**Figure S2.** Isotherms of N<sub>2</sub> adsorption-desorption onto MAF-5

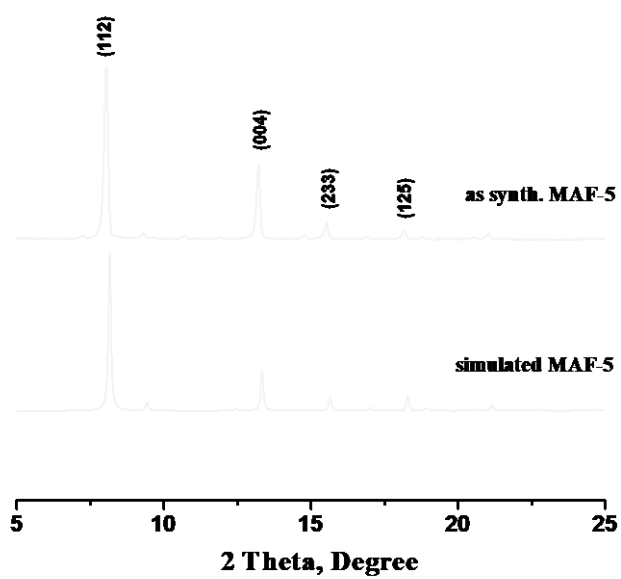

**Figure S3.** XRD pattern of MAF-5

### 3. Characterization of MAF-6 samples

#### 3.1. Textural properties of MAF-6 samples

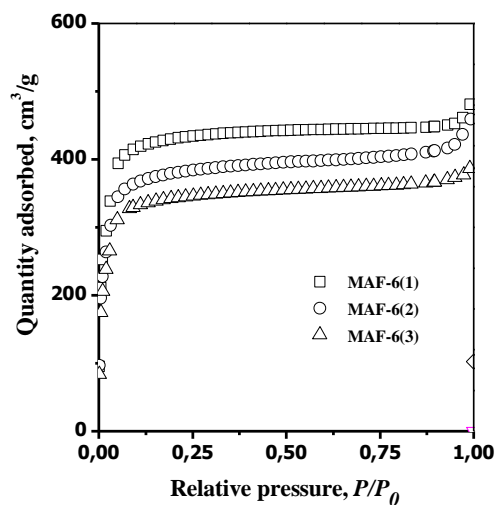

Figure S4. Isotherms of N<sub>2</sub> adsorption-desorption onto MAF-5 and MAF-6 samples

#### 3.1. Characterization of MAF-6 samples by IR spectroscopy

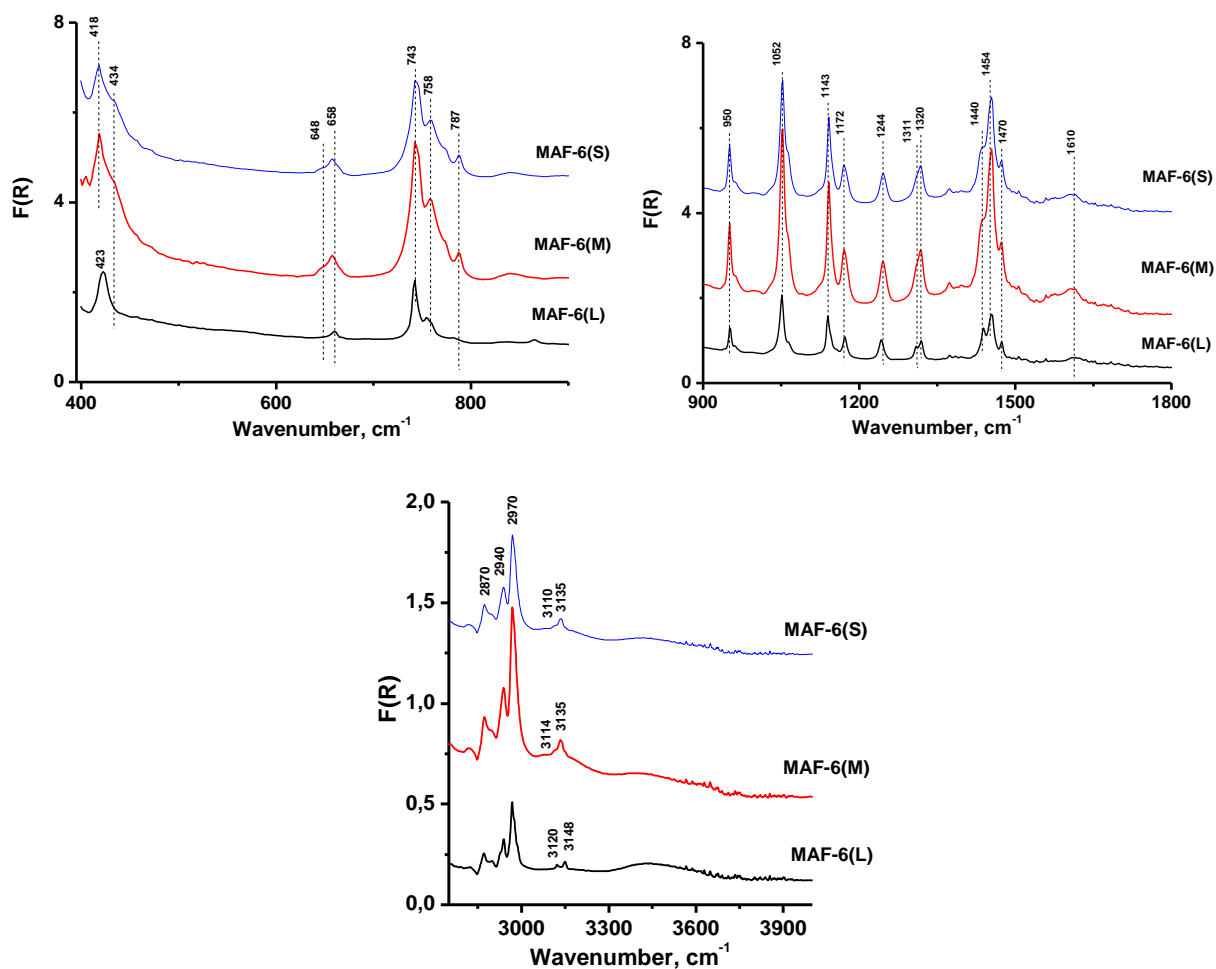

Figure S5. DRIFT spectra of MAF-6 with different particle size

### 3.3. Characterization of MAF-6 samples by DR-UV-vis spectroscopy

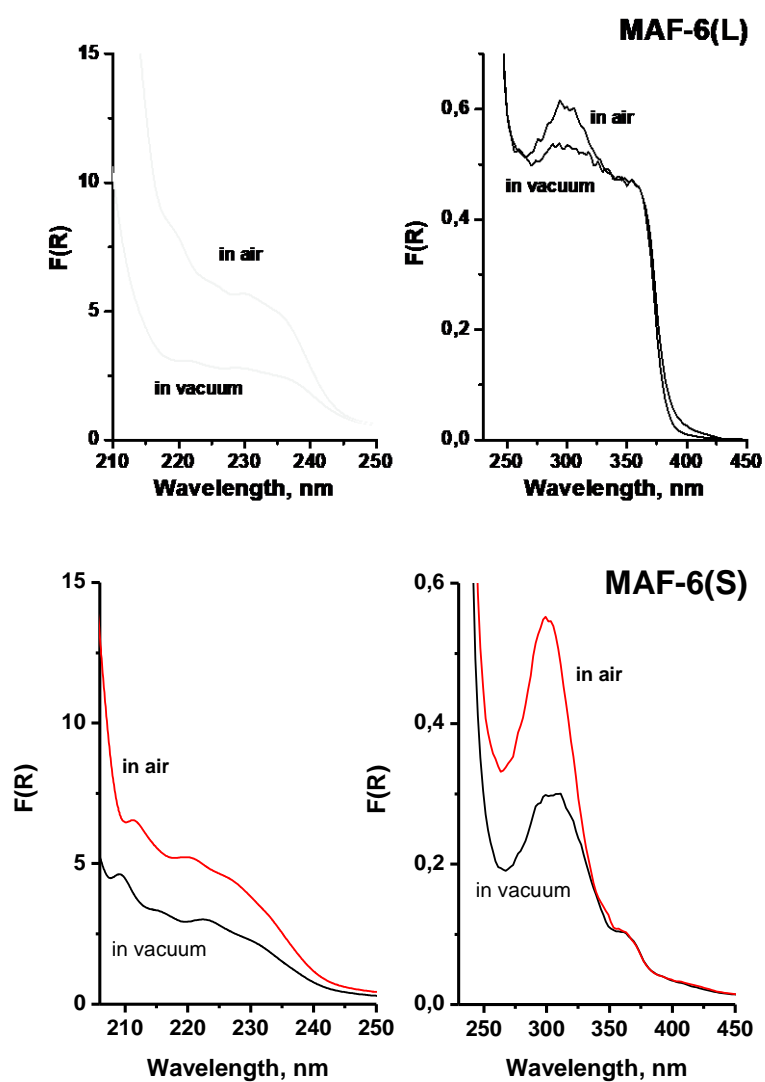

**Figure S6.** DR-UV-vis spectra of MAF-6(L) and MAF-6(S) after calcination at 150 °C for 2 h in vacuum and the next addition of wet air

### 3.4. Characterization of MAF-6 samples by DRIFT spectroscopy using $\text{CDCl}_3$ as probe molecule

Sample (0.15-0.2 g) was transferred to a cuvette (cell) suitable for DRIFTS measurements for FTIR characterization. Sample was heated under vacuum at 423 K for 2 h. The strength of the base sites was estimated using the following equation:

$$\log \Delta\nu_{\text{C-D}} = 0.0066 PA - 4.36 \quad (\text{Eq. 1})$$

where  $\nu_{\text{C-D}}$  is the shift, in  $\text{cm}^{-1}$ , of C-D vibration and  $PA$  is the proton affinity. IR spectra were recorded on a Shimadzu FTIR-8300S spectrometer with a DRS-8000 diffusion reflectance cell in the range between 400 and  $6000 \text{ cm}^{-1}$  with a resolution of  $4 \text{ cm}^{-1}$ .

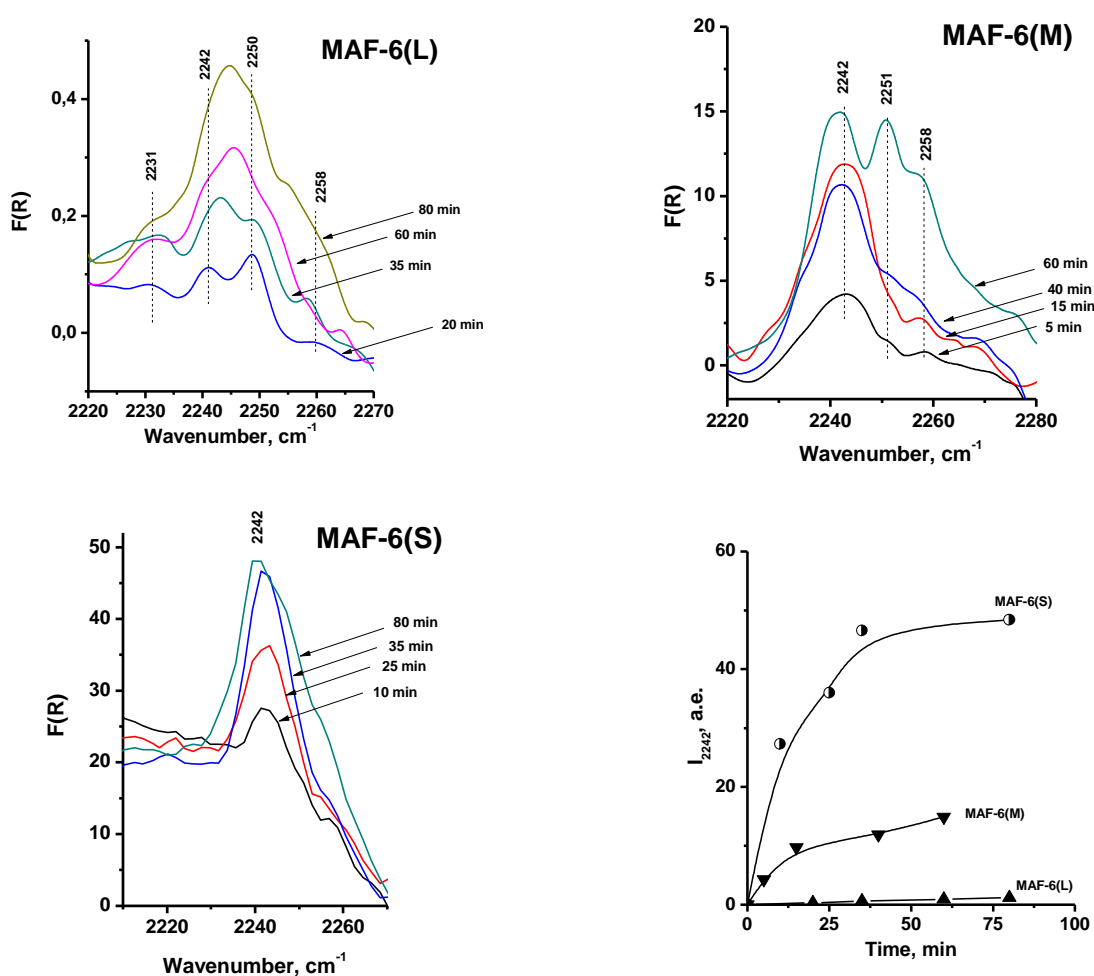

**Figure S7.** (A-C) DRIFT spectra of  $\text{CDCl}_3$  adsorbed on MAF-6 samples with different particle size. (D) The change of integral intensity of band at  $2242 \text{ cm}^{-1}$  in the course of adsorption of  $\text{CDCl}_3$ .

### 3.5. Characterization of MAF-6 samples by X-ray spectroscopy

Debye-Scherrer's formula (**Eq. 1**) was used to determine the crystal size of MAF-6 [2-3]:

$$D_{XRD} = \frac{0.9 \cdot \lambda}{\beta \cdot \cos \theta} \quad (1)$$

where  $D_{XRD}$  is particle size (nm),  $\beta$  is the full-width at half maximum of the peak (radian),  $\theta$  is the Bragg angle of diffraction peak (grad), and  $\lambda$  is X-ray wavelength of  $\text{CuK}\alpha$  (0.1542 nm). The crystal size of MAF-6 was found to change in the order:

$$\text{MAF-6(L)} > \text{MAF-6(M)} > \text{MAF-6(S)}$$

It is interesting that reflections shift with increasing crystal size. Thus, the decreasing crystal size from 810 Å to 360 Å leads to shifting reflection of (211) from 7.28° to 7.48° ( $2\theta$ ). Moreover, the intensity of this reflection decreases, and signal half-width broadens. These changes can be related to variation of crystal size

**Table S2.** MAF-6 particle size estimated from XRD and SEM data

|          | Particle size |           |           | $D_{XRD}$ | $D_{SEM}$ | $\frac{D_{SEM}}{D_{XRD}}$ |
|----------|---------------|-----------|-----------|-----------|-----------|---------------------------|
|          | $d_{200}$     | $d_{211}$ | $d_{220}$ | (Å)       | (Å)       |                           |
| MAF-6(L) | 38            | 38        | 32        | 36±2      | 810       | 23                        |
| MAF-6(M) | 27            | 32        | 27        | 29±2      | 360       | 12                        |
| MAF-6(S) | 24            | 24        | 25        | 24±1      | 190       | 10                        |



## 4. Catalytic properties

### 4.1. Catalytic properties of MAF-5

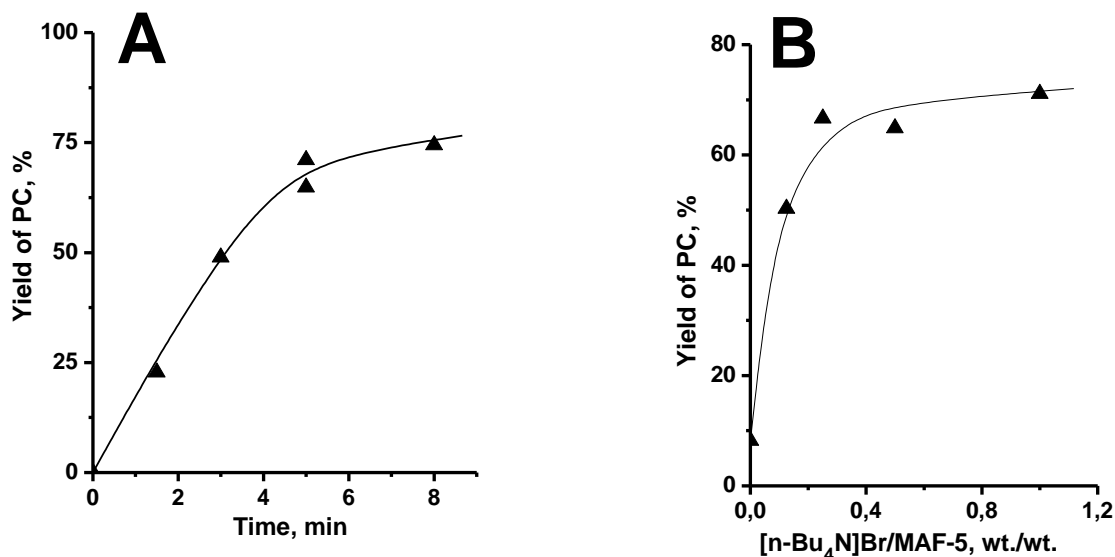

**Figure S8.** (A) Kinetic curve of propylene carbonate accumulation in the presence of MAF-5 (Experimental conditions: 24 mmol of propylene oxide, 8 atm of CO<sub>2</sub> (at room temperature), 0.85 mmol MAF-5, 0.85 mmol of [n-Bu<sub>4</sub>N]Br, 80 °C). (B) Effect of [n-Bu<sub>4</sub>N]Br amount in reaction mixture on yield of propylene carbonate in the presence of MAF-5 (Experimental conditions: 24 mmol of propylene oxide, 8 atm of CO<sub>2</sub> (at room temperature), 0.85 mmol of catalyst, 80 °C, 5 h).

### 4.2. Catalytic properties of MAF-6 samples

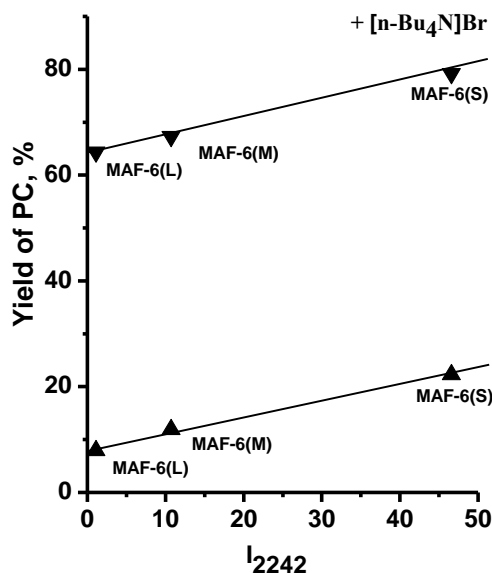

**Figure S9.** Dependence of PO conversion on the number of basic sites (I<sub>2242</sub>)

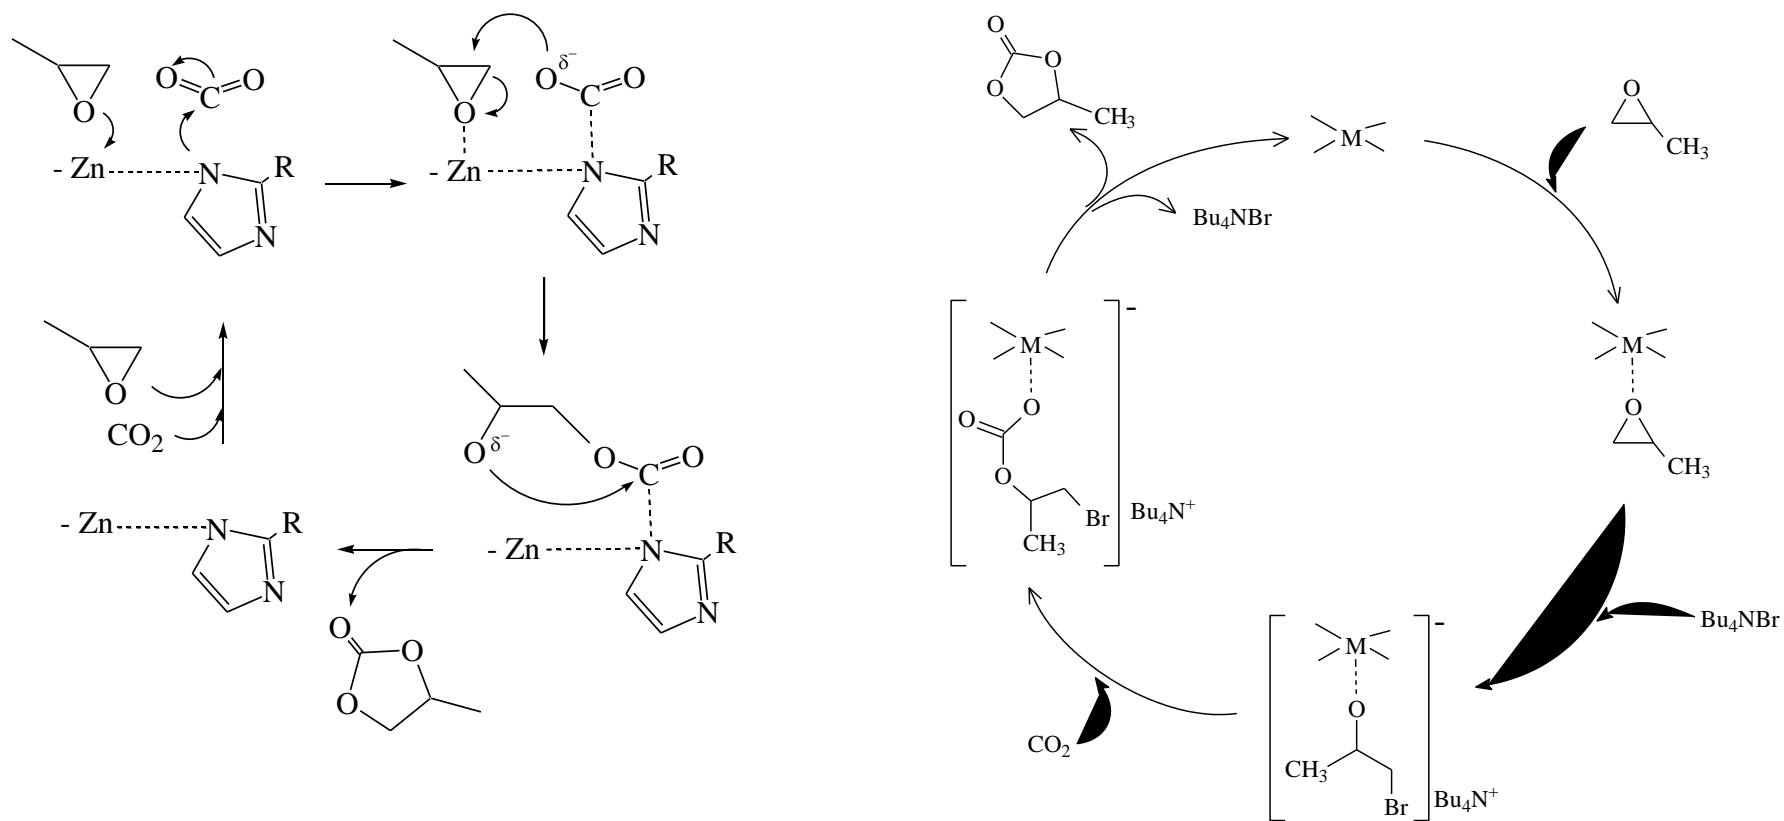

**Scheme S1.** Mechanisms of reaction between propylene oxide and CO<sub>2</sub>

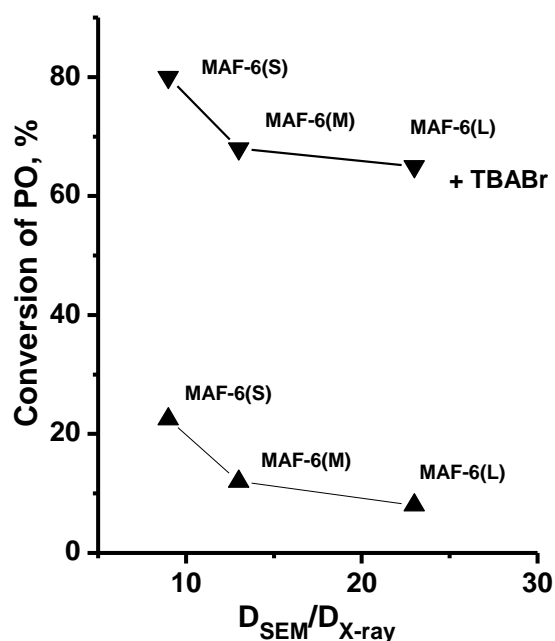

**Figure S10.** Dependence of PO conversion on the ratio of  $D_{SEM}/D_{X-ray}$ .

## 5. References

[1] Phan, A.; Doonan, C.; Fernando, J.; Uribe-Romo, J.; Knobler, C. B.; O’Keeffe, M.L.; Yaghi O. M., Synthesis, structure, and carbon dioxide capture properties of zeolitic imidazolate frameworks, *Accounts of Chemical Research*, **2010**, 43, 58-67

[DOI: 10.1021/ar900116g](https://doi.org/10.1021/ar900116g)

[2] Abdel-wahab, M.S.; Jilani, A.; Yahia, I.S.; Al-Ghamdi, A.A.; Enhanced the photocatalytic activity of Ni-doped ZnO thin films: Morphological, optical and XPS analysis, *Superlatt. Microstruct.*, **2016**, 94, 108-118

[DOI: 10.1016/j.spmi.2016.03.043](https://doi.org/10.1016/j.spmi.2016.03.043)

[3] Jilani, A., Abdel-wahab, M. S., Al-ghamdi Attieh A., Dahlan, A. sadik, Yahia, I. S. Nonlinear optical parameters of nanocrystalline AZO thin film measured at different substrate temperatures, *Physica B: Condensed Matter*, **2016**, 481, 97-103

[doi:10.1016/j.physb.2015.10.038](https://doi.org/10.1016/j.physb.2015.10.038)
